# Supplementary material
Source: HighWire-hosted journal article supplement (https://erj.ersjournals.com/content/59/6/2200766)
Supplement: inline-supplementary-material-1 [file inline-supplementary-material-1.pdf]

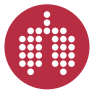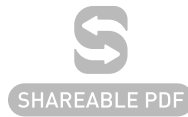

# Reply to: Inaccuracy of pulse oximetry in darker-skinned patients is unchanged across 32 years

Colin Crooks <sup>1,2,3</sup>, Joe West <sup>2,3,4,5</sup>, Tim Card<sup>2,3,4</sup>, Dominick Shaw <sup>3,6</sup>, Mark Simmonds<sup>3</sup> and Andrew Fogarty<sup>2,3,4</sup>

<sup>1</sup>Nottingham Digestive Diseases Centre, School of Medicine, University of Nottingham, Nottingham, UK. <sup>2</sup>NIHR Nottingham Biomedical Research Centre (BRC), Nottingham University Hospitals NHS Trust and the University of Nottingham, Nottingham, UK. <sup>3</sup>Nottingham University Hospitals NHS Trust, Nottingham, UK. <sup>4</sup>Population and Lifespan Sciences, School of Medicine, University of Nottingham, Nottingham, UK. <sup>5</sup>East Midlands Academic Health Science Network, University of Nottingham, Nottingham, UK. <sup>6</sup>Division of Respiratory Medicine, School of Medicine, University of Nottingham, Nottingham, UK.

Corresponding author: Andrew Fogarty ([andrew.fogarty@nottingham.ac.uk](mailto:andrew.fogarty@nottingham.ac.uk))

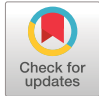

Shareable abstract (@ERSpublications)

**Inaccuracy of pulse oximetry measurements of oxygen saturation in darker-skinned individuals**  
<https://bit.ly/3rVzRpN>

**Cite this article as:** Crooks C, West J, Card T, *et al.* Reply to: Inaccuracy of pulse oximetry in darker-skinned patients is unchanged across 32 years. *Eur Respir J* 2022; 59: 2200766 [DOI: 10.1183/13993003.00766-2022].

This single-page version can be shared freely online.

Copyright ©The authors 2022.

This version is distributed under the terms of the Creative Commons Attribution Licence 4.0.

Received: 11 April 2022

Accepted: 19 April 2022

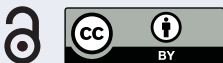

*Reply to M.J. Tobin and A. Jubran:*

We thank M.J. Tobin and A. Jubran for their interest in our data [1]. As they state, it is an extension of a body of work that they helped establish over 30 years ago.
